# Supplementary material for: Nephrin strands contribute to a porous slit diaphragm scaffold as revealed by electron tomography
Source: JCI journal article supplement (doi:10.1172/jci22562), 2004-11-15
Supplement: sd1 [file 1]

**Figure 1**

**Effect of refinement on surface rendered images**

**A) Unrefined density of Fig. 1G**

**B) Refined density of Fig. 1G**

**C) Unrefined density of Fig. 6A detail**

**D) Refined density of Fig. 6A detail**

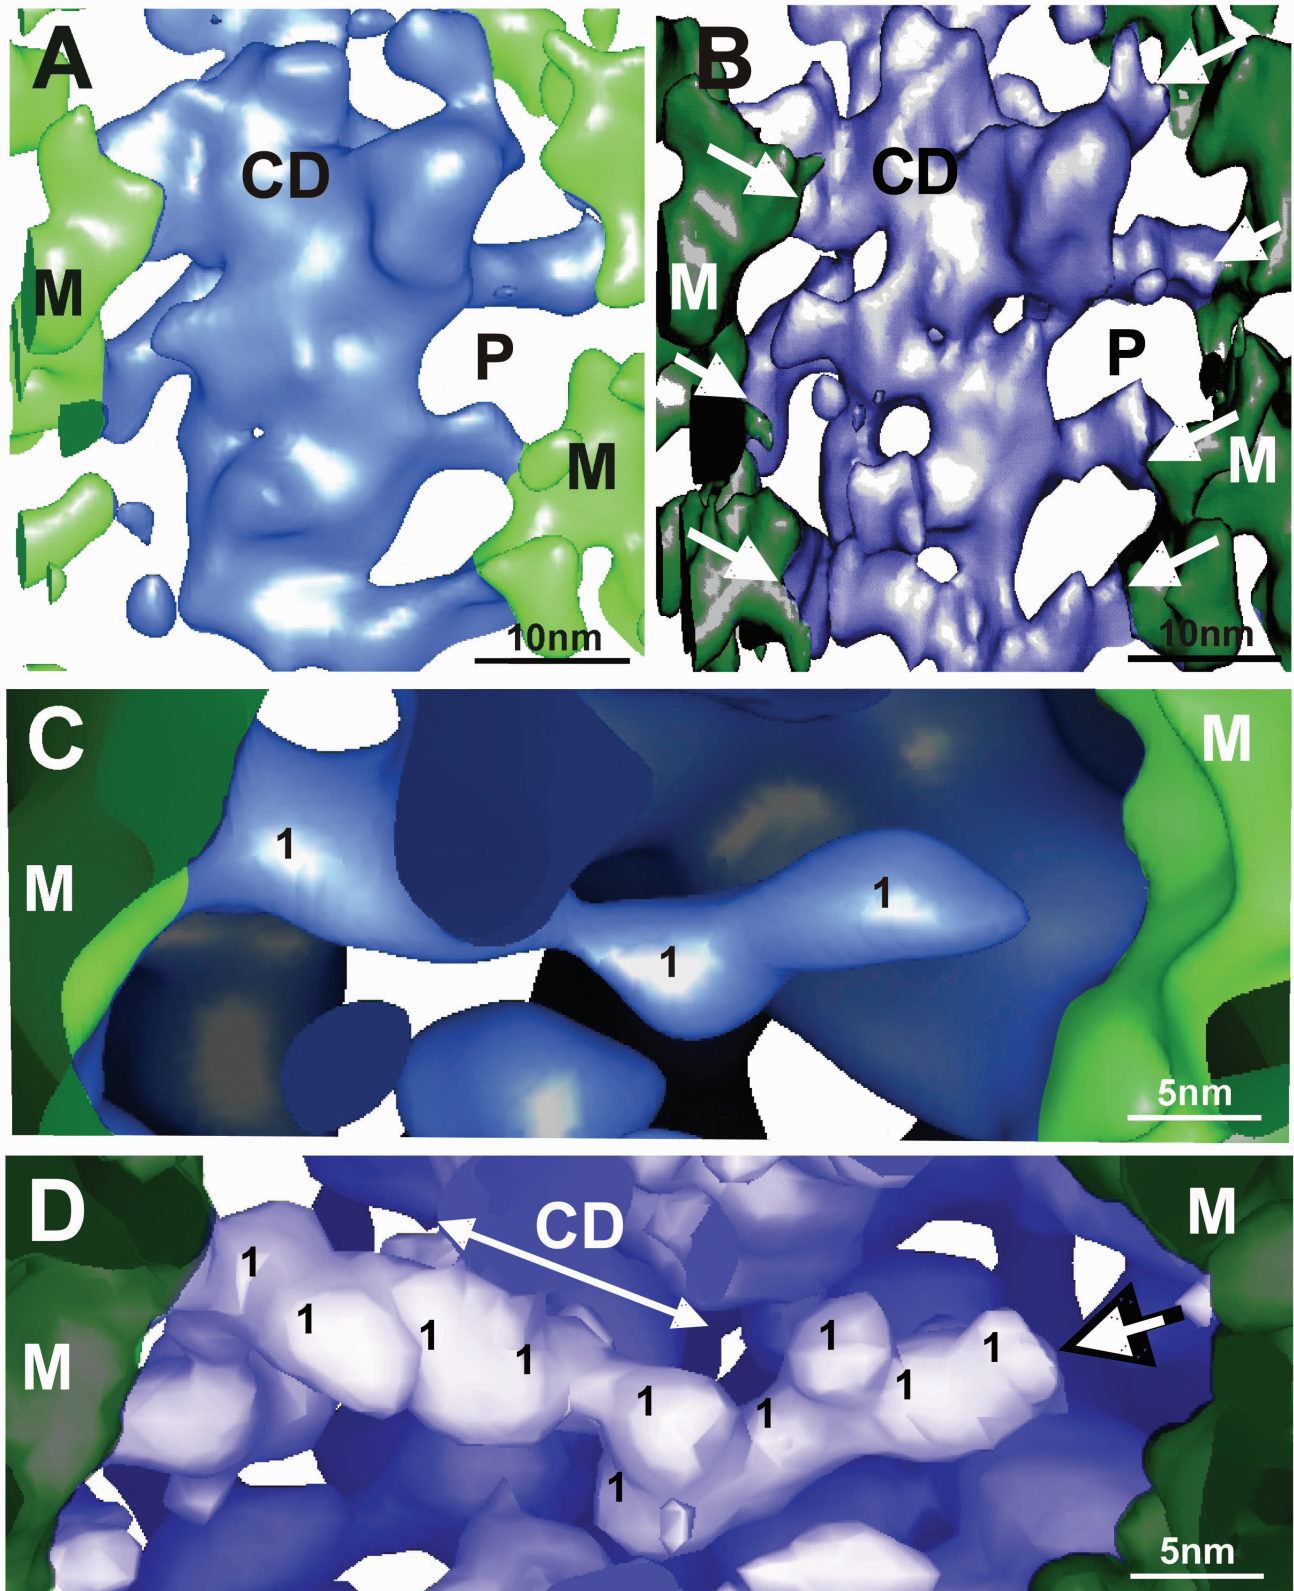

**COMET-refinement reveals details but the basic pattern and shape of the slit diaphragm and its pores and strands is partly visible already before refinement.**
